# Supplementary material
Source: Research Square preprint supplement (doi:10.21203/rs.3.rs-8533090/v1)
Supplement: Supplementary file 1 [file fd7edc3a03fe96cca6e3f780.docx]

# **Supplementary material to “When patients’ voices aren’t heard: estimands and statistical methods for handling missing patient-reported outcomes in oncology studies”.**

Example code from each of the methods proposed in the tutorial paper is provided below. For the statistical models, the code assumes that PRO data is in long format, similar to a CDISC ADQS dataset (ds), with one row per PRO assessment timepoint (AVISITN, which includes assessments at baseline and month 1 to month 6). The ds dataset includes subject ID (USUBJID), treatment assignment (TRT01PN=1 for “Treatment”, TRT01PN=2 for “Control”) and three stratification factors (STRAT01N - STRAT03N). AVAL is the PRO score at each visit. A second data set, similar to a CDISC ADTTE dataset (ds_pfs) with one row per patient including time-to-event data is used additionally for the divergent bar plot and joint model.

## **Divergent bar chart for summary of missing data**

The divergent bar chart summary was implemented using R. In the ds dataset, visits were flagged (PROEXPFL) as not expected following withdrawal from the study, disease progression or death. The reason for the PRO not being expected before death occurred was either progression or study withdrawal, whichever happened first. Following the death date the reason for the PRO not being expected is updated to death.

From this, a summary dataset is created (divergent_bar_plot_ds, example below), with the percentage (Percent) of patients in each category at each visit (AVISITN) by treatment (TRT01PN).

| **TRT01PN** | **AVISITN** | **TYPE** | **Percent** |
| --- | --- | --- | --- |
| 1 | 0 | Expected: PRO data | 5 |
| 1 | 0 | Expected: Missing PRO data | 95 |
| 1 | 0 | Not Expected: Disease Progression | 0 |
| 1 | 0 | Not Expected: Withdrew | 0 |
| 1 | 0 | Not Expected: Death | 0 |
| 1 | 1 | Expected: PRO data | 9 |
| 1 | 1 | Expected: Missing PRO data | 87 |
| 1 | 1 | Not Expected: Disease Progression | 2 |
| 1 | 1 | Not Expected: Withdrew | 1 |
| 1 | 1 | Not Expected: Death | 1 |

In order to make the plot divergent, with expected values above the x-axis and not expected values below the x-axis, the percentages are modified.

divergent_bar_plot_ds <- divergent_bar_plot_ds %>%

mutate(PCT_MOD = ifelse(

grepl("Not Expected", divergent_bar_plot_ds$TYPE, fixed = TRUE),

-1* divergent_bar_plot_ds$Percent,

divergent_bar_plot_ds$Percent))

The divergent bar chart is then plotted using ggplot.

breaks_values <- seq(-100, 100, by=50)

ggplot (data = divergent_bar_plot_ds, aes(x=AVISITN, y=PCT_MOD, fill=TYPE)) +

geom_bar( stat="identity") +

fillScale +

scale_x_discrete(name = ("Visit (Month)"), guide = guide_axis(angle = 0), breaks=seq(0, 24, by=3)) +

scale_y_continuous(name = ("Percentage (%)"), breaks = breaks_values, labels=abs(breaks_values)) +

theme_bw() +

facet_grid(~TRT01PN,

labeller=labeller(TRT01PN=treatment_names)) +

geom_hline(yintercept = 0) +

theme(legend.title=element_blank())

## **PRO Analysis - cLDA MMRM Model**

The cLDA was fit with SAS 9.4 using PROC MIXED. The model uses the raw PRO score (AVAL) as the dependent variable and includes the stratification factors (STRAT0:) and visit (AVISITN) as fixed effects. A treatment time interaction is used to allow for differences in treatment effect by visit. As the cLDA model “constrains” the treatment effect at baseline to be zero, a typical treatment-time interaction term can’t be used. Instead, indicator variables are created to fit the treatment-time interaction (TRT_AVISITN_1 – TRT_AVISITN_6), which are set to 1 at the associated timepoint and only for subjects in the control arm (TRT01PN=2).

To obtain estimates from the model at each time point an estimate statement is used. One estimate statement is required to obtain the estimated PRO score for each timepoint in each treatment arm, and the treatment difference at each timepoint. The example code snippet below gives the estimate statements for the overall/average change from baseline, and the first visit (AVISITN = 1), this would need to be replicated for each visit.

PROC MIXED data=ds;

class USUBJID TRT01PN STRAT0: AVISITN(ref="0");

model AVAL = AVISITN STRAT0: TRT_AVISITN_: / SOLUTION CL RESIDUAL DDFM = KR;

repeated AVISITN / subject=USUBJID type=UN;

# Estimate change from baseline in each treatment group (shown for AVISITN=1)

estimate 'Month AVISITN Treatment' AVISITN 1 0 0 0 0 0 -1 TRT_AVISITN_1 0 TRT_AVISITN_2 0 TRT_AVISITN_3 0 TRT_AVISITN_4 0 TRT_AVISITN_5 0 TRT_AVISITN_6 0 / cl;

estimate 'Month AVISITN Control' AVISITN 1 0 0 0 0 0 -1 TRT_AVISITN_1 1 TRT_AVISITN_2 0 TRT_AVISITN_3 0 TRT_AVISITN_4 0 TRT_AVISITN_5 0 TRT_AVISITN_6 0 / cl;

estimate 'Month AVISITN diff' TRT_AVISITN_1 -1 / cl;

# Overall treatment effect estimates (up to month 6)

estimate 'Treatment Overall' AVISITN 0.16666 0.16666 0.16666 0.16666 0.16666 0.16666 -1

TRT_AVISITN_1 0 TRT_AVISITN_2 0 TRT_AVISITN_3 0 TRT_AVISITN_4 0 TRT_AVISITN_5 0 TRT_AVISITN_6 0 / cl;

estimate 'Control Overall' AVISITN 0.16666 0.16666 0.16666 0.16666 0.16666 0.16666 -1

TRT_AVISITN_1 0.16666 TRT_AVISITN_2 0.16666 TRT_AVISITN_3 0.16666 TRT_AVISITN_4 0.16666 TRT_AVISITN_5 0.16666 TRT_AVISITN_6 0.16666 / cl;

estimate 'Overall diff'

TRT_AVISITN_1 -1 TRT_AVISITN_2 -1 TRT_AVISITN_3 -1 TRT_AVISITN_4 -1 TRT_AVISITN_5 -1 TRT_AVISITN_6 -1 / cl divisor = 6;

run;

## **PRO Analysis - Multiple Imputation**

The estimator method using MNAR multiple imputation method described is detailed here using SAS 9.4, with calls to PROC MI and PROC MIXED. The data is transposed to a wide format (ds_wide), with a column for each month (MONTH0-MONTH6), we first impute all monotone missing data patterns with 100 MCMC chains.

PROC MI data= ds_wide nimpute=100 out=mono_imputed seed=12345 minimum=0 maximum=100;

var TRT01PN STRAT0: MONTH:;

mcmc CHAIN=MULTIPLE impute=monotone;

run;

For each imputed dataset, using the control arm, we impute the missing data with monotone regression.

PROC MI data=mono_imputed NIMPUTE=1 out=imputed_all seed=28456 minimum= . 0 maximum= . 100;

by _Imputation_;

class TRT01PN;

var STRAT0: MONTH0 MONTH1 MONTH2 MONTH3 MONTH4 MONTH5 MONTH6;

monotone REG(/details);

mnar model(MONTH1 MONTH2 MONTH3 MONTH4 MONTH5 MONTH6 / modelobs= (TRT01PN='2'));

run;

After fitting the same cLDA model from above to the stack of imputed datasets (identified by the Label variable), PROC MIANALYZE is used to analyse the resultant estimates from the fitted cLDA models.

PROC MIANALYZE data=estimates;

by Label;

modeleffects Estimate;

stderr StdErr;

ods output ParameterEstimates=EST_MAIN;

run;

## **PRO Analysis - Joint Modelling**

The joint model was fit using R with the nlme, survival and JM packages.

In the longitudinal submodel, assessment day (ADT), which varies around the planned assessment visit time by +/- 7 days) is included as continuous. The model is fit using the nlme::lme() function. For each patient, a random intercept and slope with a multivariate normal distribution are included; an independent covariance structure for the residuals is specified by default.

fit_lm <- nlme::lme(AVAL ~ ADT +

factor(TRT01PN, levels=c(2, 1)):ADT + + factor(strat01n, levels=c(0,1)) + factor(strat02n, levels=c(0,1)) + factor(strat03n, levels=c(0,1)),

random = ~ (1 + ADT)|USUBJID,

data = ds)

A Cox proportional-hazards model is specified for the survival sub-process with the survival::coxph() function.

fit_surv <- survival::coxph(Surv(eventtime, status) ~ TRT01PN, data=ds_pfs, x=TRUE, model=TRUE)

Both sub-models are then provided to JM::jointModel(), where a time-dependent relative risk model is assumed in which the log baseline risk function is approximated using B-splines by specifying method=”spline-PH-GH”.

fit_JM <- JM::jointModel(fit_lm, fit_surv, timeVar = "ADT", method = "spline-PH-GH")
